# Supplementary material
Source: PubMed Central journal article supplement (PMC5707157)
Supplement: jci-127-94152-s001.pdf [file jci-127-94152-s001.pdf]

## Supplemental Figures

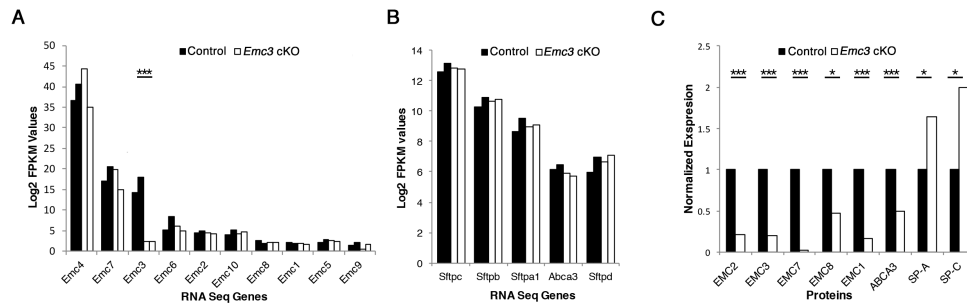

**Figure S1. RNA sequencing and proteomic data of selected genes in E18.5 control and *Emc3* cKO EpCAM+ lung cells.**

(A) RNA sequencing data of *Emc* genes were obtained in E18.5 control and *Emc3* cKO EpCAM+ lung cells. *Emc3* mRNA was decreased without changes in RNA transcripts encoding other EMC subunits in *Emc3* cKO mice.

(B) RNA sequencing data related to surfactant associated genes in E18.5 control and *Emc3* cKO EpCAM+ lung cells. No significant changes in *Abca3* or surfactant associated protein mRNAs were observed in *Emc3* cKO mice.

(C) Proteomic analysis on E18.5 control and *Emc3* cKO EpCAM+ lung cells. EMC proteins and ABCA3 were decreased and surfactant proteins SP-A and SP-C were increased in EpCAM+ cells of *Emc3* cKO lung.

For RNA sequencing, EpCAM+ lung cells from two *Emc3* cKO and two control samples were analyzed. For proteomics, four samples of each genotype were analyzed. \*P<0.05, \*\*\*P<0.001.

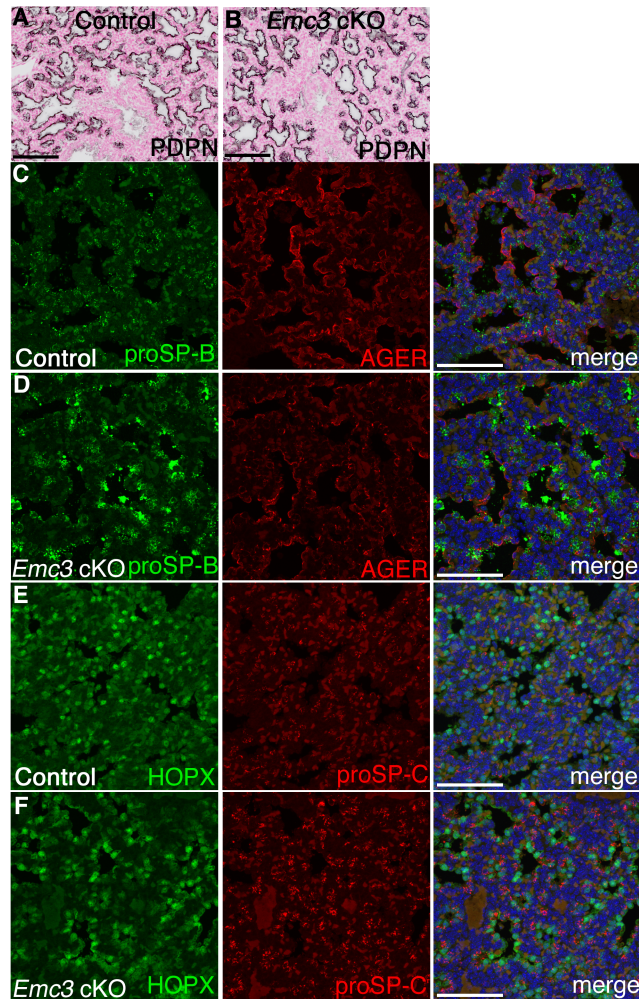

**Figure S2. *Emc3* deletion in the epithelial cells does not disrupt AT1 cell differentiation.**

(A and B) Immunohistochemical staining for Podoplanin (PDPN) on lung sections of control and *Emc3* cKO embryos at E18.5.

(C-F) Immunofluorescence staining for AGER and HOPX on lung sections of control and *Emc3* cKO embryos at E18.5.

All AT1 cell markers, PDPN, AGER or HOPX demonstrate normal patterns of staining after deletion of *Emc3*. Scale bars: 100  $\mu$ m.

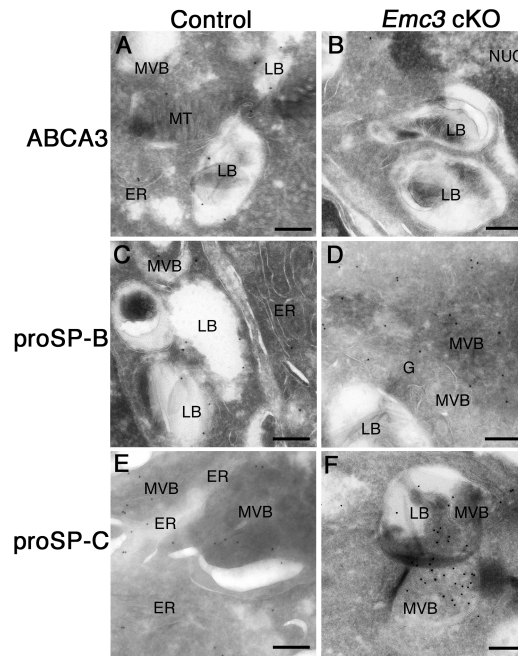

**Figure S3. Immunogold labeling of ABCA3, proSP-B, and proSP-C in E18.5 control and *Emc3* cKO embryos.**

In control AT2 cells, ABCA3 labeling was present in limiting membranes of lamellar bodies; proSP-B and proSP-C were normally processed and did not accumulate intracellularly. In *Emc3* cKO AT2 cells, ABCA3 staining was markedly decreased; both proSP-B and proSP-C accumulated in the multivesicular bodies. ER: endoplasmic reticulum; G: Golgi apparatus; LB: lamellar body; MT: mitochondria; MVB: multivesicular body; NUC: nucleus. Scale bars: 250 nm.

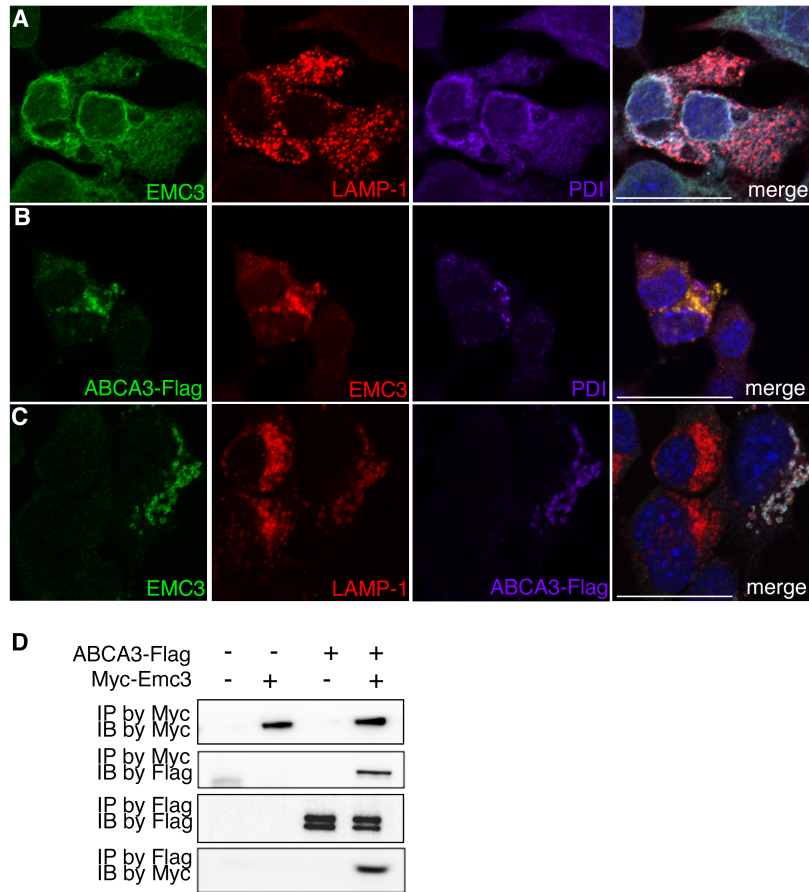

**Figure S4. Interaction between EMC3 and ABCA3 in MLE-15 cells.**

(A) Staining of MLE-15 cells with EMC3 antibody shows colocalization of endogenous EMC3 with ER marker, PDI. Scale bar: 25 $\mu$ m.

(B and C) MLE-15 cells were transfected with ABCA3-Flag alone and immunostained 48 hours later. ABCA3-Flag expression increased endogenous EMC3 levels and recruited EMC3 to LAMP-1 positive vesicles. Scale bars: 25 $\mu$ m.

(D) Equal numbers of MLE-15 cells were transfected with control vectors or Myc-Emc3 cDNA alone or ABCA3-Flag alone or both together. Cells were lysed 48 hours later and immunoprecipitated by beads conjugated with Myc antibody or Flag antibody. Samples were eluted and processed for immunoblotting. Three independent experiments were performed and representative results are shown. Antibodies used for immunoblotting are indicated on the left of the panels.



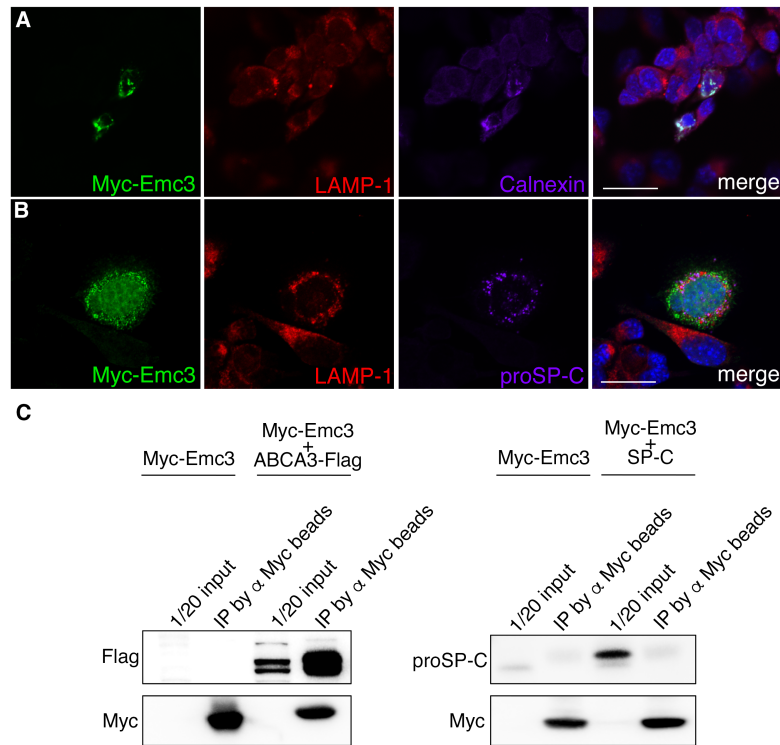

**Figure S5. Lack of EMC3-ProSP-C interaction in MLE-15 cells.**

(A) MLE-15 cells were transfected with Myc-Emc3 and immunostained 48 hours later. Scale bar: 25 $\mu$ m.

(B) MLE-15 cells were co-transfected with *SFTPC* cDNA and Myc-Emc3 and immunostained 48 hours later. Scale bar: 25 $\mu$ m.

(C) Equal numbers of MLE-15 cells were transfected with Myc-Emc3 cDNA alone or together with cDNAs expressing *Abca3-Flag* or *SFTPC*. Cells were lysed 48 hours later and immunoprecipitated by beads conjugated with Myc antibody. Samples were eluted and processed for immunoblotting. Three independent experiments were performed and representative results are shown. Antibodies used for immunoblotting are indicated on the left of the panels.

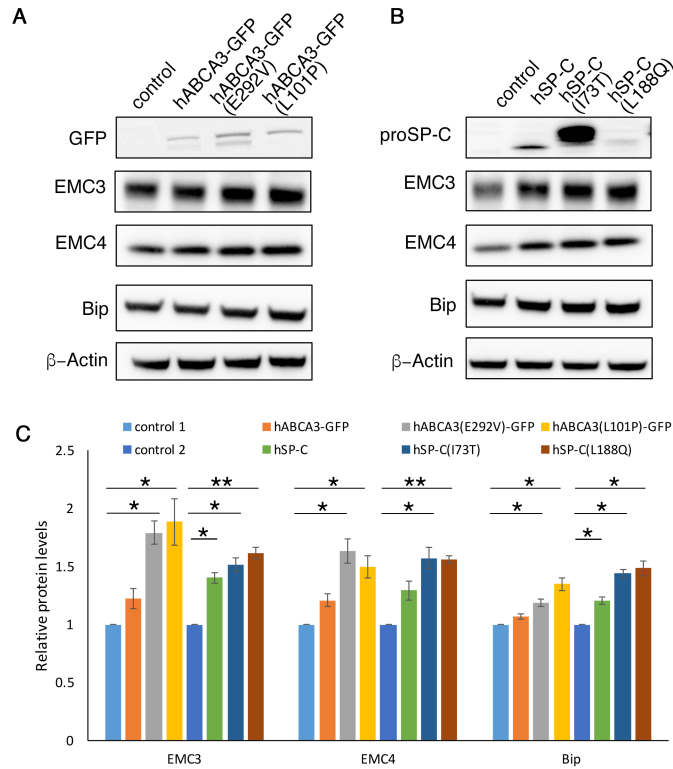

**Figure S6. Expression of human ABCA3 and SP-C variant proteins induced Bip, EMC3 and EMC4.**

(A and B) MLE-15 cells were transfected with equal amount of empty vector or constructs encoding different ABCA3 (A) or SP-C (B) variants. Cells were harvested 60 hours after transfection. Lysates were subjected to immunoblotting using indicated antibodies.

(C) Quantification of western blots shown in (A) and (B) from three independent experiments. Means and  $\pm$  SEM; \* $P < 0.05$ , \*\* $P < 0.01$  using unpaired, 2-tailed Student's t test.

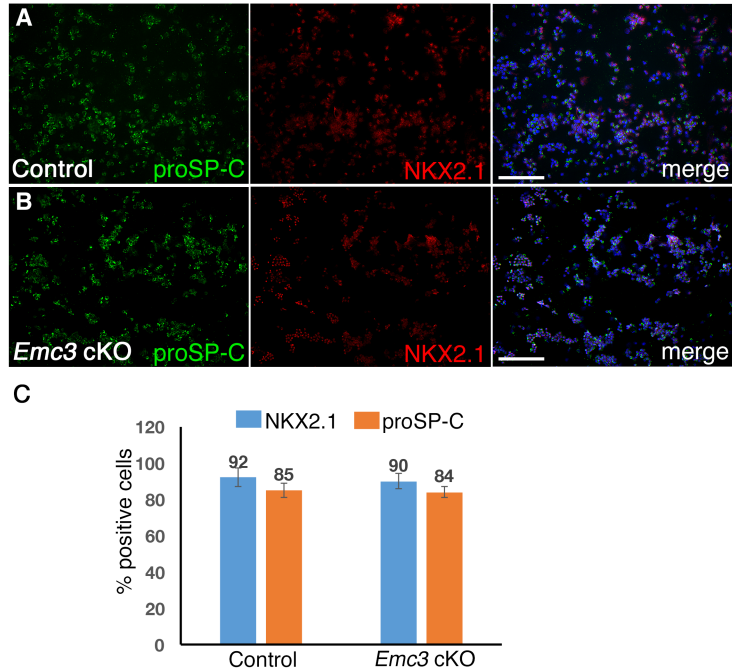

**Figure S7. Enrichment of AT2 cells after EpCAM sorting.**

EpCAM<sup>+</sup> epithelial cells were isolated from control and *Emc3* cKO fetal lungs (E18.5) using magnetic beads.

(A and B) Immunostaining of cytopins of sorted cells with NKX2.1/proSP-C and with DAPI. Representative immunofluorescence images are shown. Scale bars, 100  $\mu$ m.

(C) Quantification of the ratios of epithelial cells (NKX2.1<sup>+</sup>) and AT2 cells (proSP-C<sup>+</sup>) in DAPI<sup>+</sup> cells from the staining shown in (A) and (B). Means  $\pm$  SEM are shown. n=4/group.

## Supplemental Tables

| Genes    | Fold change in <i>Abca3</i> cKO | Fold change in <i>Emc3</i> cKO | Correlation |
|----------|---------------------------------|--------------------------------|-------------|
| Aqp3     | -7.09                           | 3.15                           | Opposite    |
| Sftpa1   | -3.95                           | 1.11                           | Opposite    |
| Gjb6     | -3.64                           | -2.30                          | Same        |
| Aqp5     | -3.20                           | -1.21                          | Same        |
| Lipg     | -2.45                           | 1.27                           | Opposite    |
| Pnliprp1 | -2.16                           | -26.67                         | Same        |
| Lpcat1   | -2.11                           | 1.01                           | Opposite    |
| Rab27a   | -1.90                           | -1.23                          | Same        |
| Pnpla2   | -1.59                           | -1.23                          | Same        |
| Sc5d     | 1.71                            | 1.30                           | Same        |

**Table S1. Comparison of differentially expressed genes in *Abca3* cKO and *Emc3* cKO lungs.**

Changes in mRNAs in whole lung from E18.5 ABCA3 gene deleted embryos (*SP-C-rtTA<sup>tg/wt</sup>;TetO-Cre<sup>tg/wt</sup>;Abca3<sup>fllox/fllox</sup>* deleted doxycycline administration to the dam from E6.5 to E14.5) (1) were compared with whole lung RNA sequencing data. Transcriptional changes in E18.5 *Emc3* cKO lungs were assessed by RNA sequencing of whole lung mRNA.

## A

| Lipid enzymes | P value | Fold change |
|---------------|---------|-------------|
| BDH2          | 0.0025  | -10.36      |
| GDPD2         | 0.0048  | -7.59       |
| MGST2         | 0.0043  | -7.56       |
| CES1D         | 0.0015  | -5.80       |
| SCD1          | 0.0033  | -5.13       |
| LPL           | 0.0044  | -4.78       |
| ACSS2         | 0.0150  | -4.40       |
| ACOXL         | 0.0101  | -4.31       |
| ACSS1         | 0.0134  | -3.83       |
| ISYNA1        | 0.0173  | -3.77       |
| TAMM41        | 0.0485  | -3.75       |
| MCEE          | 0.0352  | -3.47       |
| PAFAH2        | 0.0296  | -3.24       |
| ACSL1         | 0.0392  | -3.04       |
| GPX1          | 0.0487  | -2.87       |
| SCD2          | 0.0033* | -2.28       |

| Other lipid genes | P value | Fold change |
|-------------------|---------|-------------|
| PON1              | 0.0049  | -26.72      |
| ABCA1             | 0.00003 | -11.20      |
| FABP12            | 0.0003  | -8.58       |
| APOC1             | 0.0024  | -7.81       |
| APOE              | 0.0475  | -5.54       |
| FABP5             | 0.0041  | -4.81       |
| TECRL             | 0.0087  | -4.34       |
| SCP2              | 0.0096  | -4.05       |
| MID1IP1           | 0.0131  | -3.88       |
| PDP2              | 0.0190  | -3.79       |
| CERS4             | 0.0235  | -3.46       |
| INSIG1            | 0.0372  | -3.19       |
| FDX1              | 0.0470  | -3.10       |
| NR2F2             | 0.0408  | -3.08       |
| SLC16A1           | 0.0367  | -3.05       |
| NSMAF             | 0.0432  | -2.95       |

| UPR Genes | P value | Fold change |
|-----------|---------|-------------|
| CREB3L1   | 0.0194* | -2.08       |
| ATF4      | 0.0178* | 1.54        |
| DDIT3     | 0.0084* | 1.70        |
| BHLHA15   | 0.0030* | 1.72        |
| HSPA5     | 0.0036* | 1.77        |
| MAP3K5    | 0.0430* | 1.86        |
| TRIB3     | 0.0377* | 1.88        |
| PDIA5     | 0.0041* | 2.00        |
| DNAJB9    | 0.0376* | 2.15        |
| KDEL3     | 0.0057* | 2.16        |
| ASNS      | 0.0341* | 2.25        |
| ATF3      | 0.0190  | 4.20        |
| THBS1     | 0.0027  | 5.40        |

\* P value from Altanalyze analysis

## B

| Lipid enzymes | P value | Fold change |
|---------------|---------|-------------|
| SOAT1         | 0.0009  | -5.21       |
| MCCC1         | 0.0019  | -2.31       |
| GALC          | 0.0071  | -2.11       |
| GDE1          | 0.0002  | -2.02       |
| CES1D         | 0.0008  | -1.95       |
| PCCA          | 0.0018  | -1.82       |
| CAT           | 0.0003  | -1.81       |
| IVD           | 0.0011  | -1.64       |
| MCCC2         | 0.0012  | -1.58       |
| PCCB          | 0.0068  | -1.56       |
| NAGA          | 0.0194  | -1.48       |
| PIGU          | 0.0077  | -1.46       |
| NSDHL         | 0.0486  | -1.41       |
| ACLY          | 0.0013  | -1.38       |
| HMGCS1        | 0.0248  | -1.38       |
| ECI2          | 0.0081  | -1.38       |
| ASAH1         | 0.0010  | -1.37       |
| ACAA2         | 0.0029  | -1.36       |
| ACSL1         | 0.0360  | -1.34       |
| HACD3         | 0.0107  | -1.33       |
| MUT           | 0.0014  | -1.33       |
| ADH5          | 0.0171  | -1.32       |
| ACOT2         | 0.0018  | -1.31       |
| ECHS1         | 0.0104  | -1.31       |
| ACAT2         | 0.0340  | -1.30       |
| ECI1          | 0.0083  | -1.30       |
| GPX1          | 0.0097  | -1.28       |
| ACSL5         | 0.0019  | -1.26       |
| ACAT1         | 0.0046  | -1.25       |
| PRDX6         | 0.0082  | -1.24       |
| GCDH          | 0.0165  | -1.23       |
| ACACA         | 0.0471  | -1.22       |
| ATG7          | 0.0483  | -1.22       |
| CPT2          | 0.0033  | -1.20       |
| ANXA1         | 0.0019  | 1.43        |
| GDPD2         | 0.0000  | †Absent     |
| SCD1          | 0.0451  | †Absent     |
| MCEE          | 0.0000  | †Absent     |

| Other lipid proteins | P value | Fold change |
|----------------------|---------|-------------|
| GOLM1                | 0.0237  | -2.90       |
| FABP5                | 0.0024  | -2.62       |
| NPC2                 | 0.0136  | -2.60       |
| SCPEP1               | 0.0001  | -2.05       |
| ABCA3                | 0.0004  | -2.03       |
| SFTPB                | 0.0011  | -2.02       |
| ATP1A1               | 0.0000  | -1.92       |
| ABCD3                | 0.0016  | -1.77       |
| SCP2                 | 0.0019  | -1.68       |
| SORL1                | 0.0075  | -1.68       |
| ERLIN1               | 0.0031  | -1.58       |
| PC                   | 0.0029  | -1.39       |
| STOML2               | 0.0377  | -1.26       |
| PON1                 | 0.0494  | †Absent     |
| SLC44A1              | 0.0000  | †Absent     |
| AGK                  | 0.0000  | †Absent     |
| EIF6                 | 0.0411  | 1.24        |
| LAMTOR1              | 0.0024  | 1.26        |
| AKT1                 | 0.0130  | 1.34        |
| PSAP                 | 0.0108  | 1.73        |
| C3                   | 0.0373  | 1.90        |

| UPR proteins | P value | Fold change        |
|--------------|---------|--------------------|
| ASNA1        | 0.0060  | -1.65              |
| ATP6V0D1     | 0.0478  | -1.59              |
| SEC61A1      | 0.0044  | -1.36              |
| UBA5         | 0.0393  | 1.21               |
| SEC31A       | 0.0082  | 1.21               |
| GFPT1        | 0.0075  | 1.23               |
| FAM129A      | 0.0018  | 1.26               |
| LMNA         | 0.0065  | 1.27               |
| TMEM33       | 0.0271  | 1.33               |
| PDIA5        | 0.0162  | 1.33               |
| ERP44        | 0.0369  | 1.38               |
| MANF         | 0.0042  | 1.43               |
| GOSR2        | 0.0380  | 2.48               |
| THBS1        | 0.0423  | Induced in KO only |

| Cathepsins | P value | Fold change |
|------------|---------|-------------|
| CTSZ       | 0.0012  | -3.71       |
| CTSC       | 0.0004  | -3.00       |
| CTSB       | 0.0039  | -1.88       |
| CTSH       | 0.0036  | -1.58       |
| *NAPSA     | 0.0650  | -1.28       |

\* P value >0.05

†Absent: not detectable in the KO but present in the control

**Table S2. Changes of mRNAs (A) and proteins (B) in EpCAM+ cells sorted from *Emc3* cKO fetal lungs (E18.5).** Results were obtained by RNA sequencing and proteomic analysis from control and *Emc3* cKO AT2 cells as described in Methods.

| Phosphatidylcholine Species | Fold change | Phosphatidylglycerol Species | Fold change | Triglyceride Species                  | Fold change |
|-----------------------------|-------------|------------------------------|-------------|---------------------------------------|-------------|
| PC(O-38:5)                  | 1.858       | PG(14:0/15:0)                | -1.374      | TG(16:0/16:0/16:0)                    | 3.396       |
| PC(15:0/16:0)               | 1.506       | PG(16:0/16:0)                | -1.376      | TG(18:0/18:1/20:4)                    | 2.431       |
| PC(16:0/22:4)               | 1.263       | PG(16:0/22:4)_B              | -1.455      | TG(16:0/16:0/18:1)                    | 2.309       |
| PC(16:0/20:3)               | -1.252      | PG(14:0/16:0)                | -1.480      | TG(14:0/14:0/16:0)                    | 2.271       |
| PC(16:0/16:1)               | -1.253      | PG(18:1/18:2)_A              | -1.486      | TG(16:0/16:0/22:6)                    | 2.262       |
| PC(18:0/18:1)               | -1.285      | PG(16:1/20:4)_A              | -1.579      | TG(18:1/18:1/22:3)                    | 2.243       |
| PC(15:0/22:6)               | -1.339      | PG(22:6/0:0)                 | -1.607      | TG(49:1)                              | 2.208       |
| PC(20:3/20:4)               | -1.366      | PG(16:1/0:0)                 | -1.666      | TG(54:5)                              | 2.197       |
| PC(14:0/22:6)               | -1.378      | PG(14:0/18:1);PG(16:0/16:1)  | -1.785      | TG(18:1/22:4/22:4)                    | 2.130       |
| PC(20:4/20:4);PC(18:2/22:6) | -1.474      | PG(16:0/18:1)_A              | -1.843      | TG(18:1/22:1/22:6)                    | 2.068       |
| PC(22:6/22:6)               | -1.561      | PG(16:1/18:2)_A              | -1.850      | TG(16:0/16:0/16:1);TG(14:0/16:0/18:1) | 2.060       |
| PC(18:1/20:1)               | -1.579      | PG(16:0/22:6)_B              | -1.916      | TG(18:1/18:1/20:4);TG(16:0/18:1/22:5) | 2.041       |
| PC(20:4/22:6)               | -1.636      | PG(18:1/20:4)_B              | -1.956      | TG(18:1/20:1/22:3)                    | 2.032       |
| PC(16:0/20:5)               | -1.644      | PG(18:1/18:1)                | -2.104      | TG(16:0/18:1/18:1)                    | 1.942       |
| PC(18:2/22:5)               | -1.657      | PG(18:1/22:6)_B              | -2.109      | TG(18:2/18:2/20:4)                    | 1.932       |
| PC(14:0/16:1)               | -1.934      | PG(16:2/16:0)                | -2.157      | TG(54:1)                              | 1.928       |
| PC(16:1/20:4)               | -1.945      | PG(18:1/22:6)_C              | -2.266      | TG(16:0/16:0/18:0)                    | 1.906       |
| PC(16:1/22:6)               | -2.053      | PG(14:0/14:0)                | -2.370      | TG(58:4)                              | 1.898       |
| PC(16:1/0:0)                | -2.069      | PG(16:1/18:3)_B              | -2.400      | TG(51:2)                              | 1.880       |
| PC(16:1/18:2)               | -2.248      | PG(18:1/0:0)_D               | -2.446      | TG(16:0/18:1/22:6)                    | 1.874       |
| PC(16:1/16:1)               | -2.764      | PG(18:1/18:2)_B              | -2.529      | TG(53:2)                              | 1.866       |
| PC(16:1/20:5)               | -3.296      | PG(15:0/16:1)                | -2.533      | TG(52:3)                              | 1.866       |
|                             |             | PG(16:0/20:5)                | -2.557      | TG(18:0/20:4/22:6)                    | 1.830       |
|                             |             | PG(16:1/18:1)_B              | -2.752      | TG(16:0/16:0/18:2);TG(16:0/16:1/18:1) | 1.809       |
|                             |             | PG(18:2/22:6)_B              | -2.903      | TG(14:0/22:6/22:6)                    | 1.804       |
|                             |             | PG(14:1/16:0);PG(14:0/16:1)  | -3.153      | TG(49:2)                              | 1.776       |
|                             |             | PG(16:0/18:3)_A              | -3.356      | TG(16:0/18:1/24:0)                    | 1.760       |
|                             |             | PG(17:1/18:2)                | -3.446      | TG(18:2/20:4/20:4);TG(16:0/20:4/22:6) | 1.751       |
|                             |             | PG(16:0/18:2)_A              | -3.481      | TG(18:1/22:4/22:6);TG(18:1/22:4/22:6) | 1.723       |
|                             |             | PG(16:3/16:0)                | -3.847      | TG(14:0/16:0/16:1)                    | 1.698       |
|                             |             | PG(16:1/22:6)_B              | -4.043      | TG(56:1)                              | 1.691       |
|                             |             | PG(16:1/18:2)_B              | -4.516      | TG(18:2/20:4/22:6)                    | 1.684       |
|                             |             | PG(16:1/20:4)_B              | -4.578      | TG(20:4/20:4/22:6)                    | 1.683       |
|                             |             | PG(16:0/18:3)_B              | -4.918      | TG(52:5)                              | 1.592       |
|                             |             | PG(16:1/17:1)                | -5.484      | TG(18:1/18:1/22:1);TG(18:1/20:1/20:1) | 1.591       |
|                             |             | PG(16:1/16:1)                | -5.854      | TG(14:0/20:4/22:6)                    | 1.545       |
|                             |             | PG(16:1/20:5)                | -6.608      | TG(50:3)                              | 1.538       |
|                             |             |                              |             | TG(18:1/22:6/22:6)                    | 1.433       |

**Table S3. Changes in the concentrations of lipid species in EpCAM+ cells sorted from *Emc3* cKO fetal lungs (E18.5).**

Results were obtained by lipidomics analysis as described in Methods. Fold changes of significantly changed lipid species are shown,  $P < 0.05$  using two-tailed, homoscedastic t-tests.  $n = 4$ /group.

## Reference

1. Besnard V, Matsuzaki Y, Clark J, Xu Y, Wert SE, Ikegami M, Stahlman MT, Weaver TE, Hunt AN, Postle AD, et al. Conditional deletion of *Abca3* in alveolar type II cells alters surfactant homeostasis in newborn and adult mice. *Am J Physiol Lung Cell Mol Physiol.* 2010;298(5):L646-59.
